# Supplementary material for: Nivolumab Versus Docetaxel for Previously Treated Advanced Non-Small Cell Lung Cancer in China: A Cost-Effectiveness Analysis
Source: Springer Nature journal article supplement (doi:10.1007/s40261-019-00869-3), 2019-11-02
Supplement: MOESM1 [file 24113648]

## Supplementary Material

### Journal: Clinical Drug Investigation

#### Nivolumab Versus Docetaxel for Previously Treated Advanced Non-Small Cell Lung Cancer in China :A Cost-effectiveness Analysis

Qiao Liu<sup>a</sup>, Xia Luo<sup>a</sup>, Liubao Peng<sup>a</sup>, Lidan Yi<sup>a</sup>, Xiaomin Wan<sup>a</sup>, Xiaohui Zeng<sup>b\*</sup>, Chongqing Tan<sup>a\*</sup>

<sup>a</sup>Department of Pharmacy, the Second Xiangya Hospital of Central South University, Changsha, Hunan, People's Republic of China

<sup>b</sup>PET-CT Center, the Second Xiangya Hospital of Central South University, Changsha, Hunan, People's Republic of China

**\*Author for correspondence:** Xiaohui Zeng. PET-CT Center, the Second Xiangya Hospital of Central South University, Changsha, Hunan 410011, China. Tel: +8613787139446. Email: [zengxiaohui2008@csu.edu.cn](mailto:zengxiaohui2008@csu.edu.cn); Chongqing Tan. Department of Pharmacy, The Second Xiangya Hospital, Central South University, Changsha, Hunan 410011, China. Tel: +86073185292094. Email: [tanchongqing@csu.edu.cn](mailto:tanchongqing@csu.edu.cn).

## Appendix 1 The selection of survival models for the docetaxel arm

The pseudo-individual patient data were fitting using R software (version 3.3.1, <http://www.r-project.org>) based on four commonly used parametric survival models, including weibull, exponential, log-logistic and log-normal distributions.

### *OS Fit*

As for the pseudo-individual patient OS data of docetaxel, the visual fits and statistical fits of four parametric survival models are displayed in Figure1-1 and Table1-1. The visual fits of the OS curves showed that the extrapolation of exponential, log-logistic and log-normal distributions produced extended tails, which would likely overestimate OS in the long term. Based on the statistic goodness-of-fit tests including Akaike information criteria (AIC) and Bayesian information criteria (BIC), the Weibull distribution provide the lowest AIC and BIC. Therefore, the Weibull distribution was the optimal fit for OS of docetaxel.

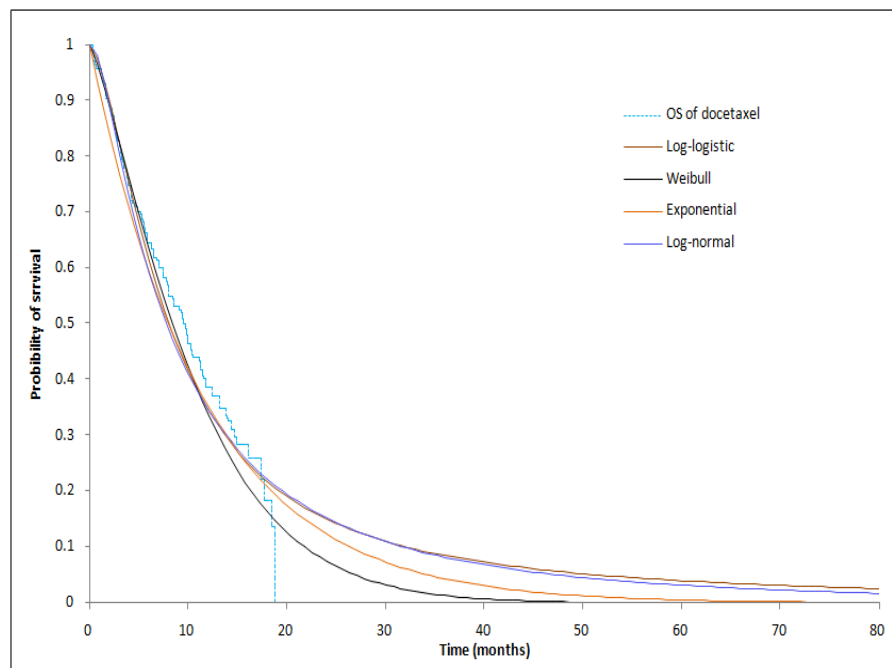

**Figure1-1 Docetaxel OS data fitting and extrapolation**

**Table 1-1. The summary of docetaxel OS fitting**

| <b>Distribution</b> | <b>AIC</b> | <b>BIC</b> |
|---------------------|------------|------------|
| Exponential         | 799.5163   | 802.6283   |
| Weibull             | 795.1152   | 801.3392   |
| Log-logistic        | 800.8650   | 810.5235   |
| Log-normal          | 804.2995   | 807.0889   |

***PFS Fit***

As for the pseudo-individual patient PFS data of docetaxel, the visual fits and statistical fits of four parametric survival models are displayed in Figure A1-2 and Table A1-2. The visual fits of the PFS curves showed that all four distributions provided a similar fit. Based on the statistical goodness-of-fit alone, log-logistic distribution had the lowest AIC and BIC, however the log-logistic distribution produced the longest extended tail, which meant PFS would be overestimated in long term. Meanwhile, the AIC and BIC of Weibull distribution was slightly higher than that of log-logistic distribution. Considering that the fitting for OS and PFS in the same group were as consistent as possible, Weibull distribution was chosen for PFS of docetaxel.

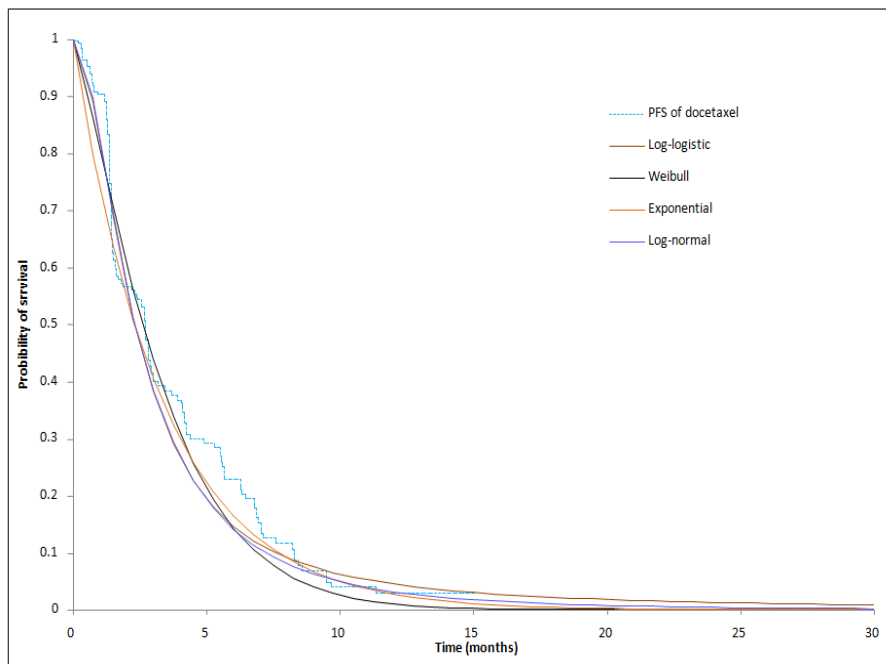

**Figure 1-2. Docetaxel PFS data fitting and extrapolation**

**Table 1-2. The summary of docetaxel PFS fitting**

| <b>Distribution</b> | <b>AIC</b> | <b>BIC</b> |
|---------------------|------------|------------|
| Exponential         | 695.3264   | 698.4384   |
| Weibull             | 688.2550   | 694.4790   |
| Log-logistic        | 693.8375   | 692.5693   |
| Log-normal          | 686.3453   | 700.0615   |

## Appendix 2 The results of the subgroup analyses.

Based on model hypothesis and clinical rationality, we choose Weibull distribution to fit the OS and PFS data for all subgroups in CheckMate 078 trial, therefore, the Weibull parameters were adjusted using the same method as previously described in our manuscript, that is, the shape ( $\gamma$ ) parameters of all nivolumab subgroups were the same as those of the docetaxel arm ( $\gamma_{\text{Nivolumab}} = \gamma_{\text{Docetaxel}}$ ), and the scale ( $\lambda$ ) parameters were multiplied by those of the docetaxel arm and the HR ( $\lambda_{\text{Nivolumab}} = \text{HR} \times \lambda_{\text{Docetaxel}}$ ).

As for gender subgroup, considering that the weight differences, a base case patient with an average weight of 65 kg and 58kg were used in male subgroup and female subgroup respectively. The other model parameters were assumed to be same. For male subgroup and female subgroup, the nivolumab strategy added costs of \$22,739 and \$15,587, respectively, relative to docetaxel strategy, resulting in ICERs of \$95,302 and \$85,273 per QALY, respectively. Therefore, nivolumab was likely to be more cost-effective for female patients with advanced NSCLC.

As for CNS metastases and No CNS metastases subgroups, we assumed all the model parameters were the same, except for the CNS metastases management costs and health utility values of the PFS and PS states with CNS metastases. The cost of CNS metastases management included radiotherapy [whole brain radiotherapy (WBRT) and stereotactic radiotherapy (SRT)], symptomatic treatment and auxiliary examination. Symptomatic treatment, including mannitol, glucocorticoids and diuretics therapy), was used to relieve intracranial hypertension and alleviate cerebral edema, however, due to the low-priced of these drugs, the cost of symptomatic treatment wasn't added into the total cost. The costs associated CNS metastases management were listed in table2-1. Health utility values of the PFS states with CNS metastases were 0.52, which was captured from one quality of life study. As a result of the absence of a utility value for the PS state with CNS progression, this value was assumed to 0.21. Compared to docetaxel arm, the ICERs in nivolumab arm were \$143,663 per QALY gained for CNS metastases subgroup and \$94,292 per QALY gained for no CNS metastases subgroup, respectively, therefore, nivolumab was likely to be more cost-effective for advanced NSCLC without CNS metastases. Subgroup-specific model parameters were listed in Table2-1.

As for other subgroups, we assumed the same data in all subgroups except for the OS HRs and PFS HRs in the model. The results of the subgroup analyses were present in Table 2-2.

Table 2-1 Subgroup-specific model parameters of CNS metastases and No CNS metastases subgroups

| Parameter                                  | Base-case | Range       | Distribution | Source          |
|--------------------------------------------|-----------|-------------|--------------|-----------------|
| <b>Cost</b>                                |           |             |              |                 |
| Radiotherapy <sup>a</sup>                  |           |             |              |                 |
| WBRT per person                            | 3926      | 3141-4712   | Lognormal    | Published study |
| SRT per person                             | 6282      | 5026-7539   | Lognormal    | Published study |
| Supplementary examination <sup>b</sup>     |           |             |              |                 |
| MRI per cycle                              | 31        | 24.8-37.2   | Lognormal    | Local charge    |
| CT per cycle                               | 15        | 12-18       | Lognormal    | Local charge    |
| <b>Utilities</b>                           |           |             |              |                 |
| PFS state without CNS progression          | 0.804     | 0.643-0.965 | Beta         | Our manuscript  |
| PFS state with CNS progression             | 0.52      | 0.42-0.62   | Beta         | Published study |
| PS state without CNS progression           | 0.321     | 0.257-0.385 | Beta         | Our manuscript  |
| PS state with CNS progression <sup>c</sup> | 0.21      | 0.17-0.25   | Beta         | Published study |

WBRT: whole brain radiotherapy; SRT: stereotactic radiotherapy; MRI: magnetic resonance imaging; CT: computed tomography; PFS: progression-free survival; PS: progression survival; CNS: central nervous system.

<sup>a</sup> If patients developed CNS metastases, they would receive WBRT (60%), SRT (30%) or WBRT combined with SRT (10%), and the associated costs per person were based on the clinical expert opinions and a recent study.

<sup>b</sup> The common used auxiliary examination were MRI (90%) and CT (10%), both of which were performed every 3 months according to Chinese guidelines on the diagnosis and treatment of brain metastases of lung cancer.

°This value was assumed to 0.21, which meant that the reduction proportion between two utilities of PFS state without and with CNS metastases was consistent with that of two utilities of the PS state

Table 2-2 The results of the subgroup analyses.

| Subgroup              | HR   |      | ICER      |          |
|-----------------------|------|------|-----------|----------|
|                       | OS   | PFS  | Per LY    | Per QALY |
| Age<65 years          | 0.76 | 0.79 | 97,810    | 97,732   |
| Age≥65 years          | 0.50 | 0.68 | 49,424    | 85,171   |
| Male                  | 0.71 | 0.70 | 86,734    | 95,302   |
| Female                | 0.74 | 1.03 | 74,552    | 85,273   |
| ECOG PS 0             | 1.01 | 1.22 | -1685,338 | 121,267  |
| ECOG PS 1             | 0.69 | 0.70 | 80,920    | 94,246   |
| Current/former smoker | 0.73 | 0.72 | 91,812    | 96,286   |
| Never smoker          | 0.67 | 0.87 | 67,146    | 92,199   |
| Squamous              | 0.61 | 0.61 | 68,528    | 90,934   |
| Non-squamous          | 0.76 | 0.87 | 92,196    | 97,492   |
| CNS metastases        | 0.82 | 0.62 | 154,271   | 143,663  |
| No CNS metastases     | 0.70 | 0.79 | 78,014    | 94,292   |
| PD-L1<1               | 0.75 | 0.74 | 97,703    | 97,320   |
| PD-L1≥1               | 0.62 | 0.75 | 63,006    | 90,309   |

OS, overall survival; PFS, progression-free survival; HR, hazard ratio; ECOG PS, Eastern Cooperative Oncology Group performance status; CNS, central nervous system; PD-L1, programmed death ligand

1. ICER, incremental cost-effectiveness ratio; QALY: quality-adjusted life-year.
